# Supplementary material for: Identification of Ameloblastin as an Amyloid Precursor Protein of Amyloid-Producing Ameloblastoma in Dogs and Cats
Source: MDPI journal article supplement (doi:10.3390/vetsci10020166), 2023-02-20
Supplement: s1 [file s1]

## Supplementary Information for

Identification of ameloblastin as an amyloid precursor protein of amyloid-producing amelo-blastoma in dogs and cats

Niki Sedghi Masoud, Susumu Iwaide, Yoshiyuki Itoh, Miki Hisada, Tomoyuki Harada, Tomoaki Murakami\*

### This file includes:

Tables S1 to S5

Figure S1

**Table S1. Summary of proteins detected by LC/MS/MS of left mandibular gingiva amyloid deposit in dog number one**

| Rank     | Accession          | Description                            | Num. of significant matches | Num. of significant sequences | Score      | emPAI*      |
|----------|--------------------|----------------------------------------|-----------------------------|-------------------------------|------------|-------------|
| 1        | NP_001240670.1     | Keratin 14                             | 44                          | 18                            | 1274       | 2.18        |
| 2        | XP_548099.3        | Keratin, type I cytoskeletal 42        | 14                          | 8                             | 152        | 0.7         |
| <b>3</b> | <b>XP_539304.3</b> | <b>Ameloblastin</b>                    | <b>24</b>                   | <b>7</b>                      | <b>844</b> | <b>0.89</b> |
| 4        | NP_001332964.1     | Keratin, type II cytoskeletal 5        | 41                          | 18                            | 838        | 1.76        |
| 5        | XP_003433560.1     | Keratin, type II cytoskeletal 6A       | 17                          | 10                            | 283        | 0.69        |
| 6        | XP_543651.2        | Keratin, type II cuticular Hb2         | 3                           | 2                             | 48         | 0.12        |
| 7        | XP_543796.1        | Histone H2A.J                          | 8                           | 2                             | 235        | 0.92        |
| 8        | XP_003639664.1     | Histone H2A type 2-C                   | 4                           | 2                             | 91         | 0.54        |
| 9        | XP_532744.1        | Cationic trypsin-like                  | 6                           | 1                             | 144        | 0.13        |
| 10       | NP_001003090.1     | Collagen alpha-1(I) chain precursor    | 2                           | 1                             | 75         | 0.02        |
| 11       | XP_546510.3        | Apolipoprotein A-IV                    | 5                           | 3                             | 65         | 0.24        |
| 12       | XP_013966037.1     | uncharacterized protein LOC100856160   | 2                           | 1                             | 65         | 0.15        |
| 13       | NP_001003349.2     | Actin, cytoplasmic 2                   | 2                           | 1                             | 51         | 0.08        |
| 14       | XP_539002.2        | Collagen alpha-1(XII) chain isoform X2 | 1                           | 1                             | 41         | 0.01        |
| 15       | XP_854040.1        | Vitronectin                            | 1                           | 1                             | 38         | 0.06        |
| 16       | XP_013966933.1     | Late histone H2B.L4                    | 1                           | 1                             | 35         | 0.2         |

Ameloblastin is shown in bold. \*emPAI, exponentially modified protein abundance index.

**Table S2. Summary of proteins detected by LC/MS/MS of left mandibular amyloid Deposits in dog number two**

| Rank     | Accession          | Description                                     | Num. of significant matches | Num. of significant sequences | Score      | emPAI*      |
|----------|--------------------|-------------------------------------------------|-----------------------------|-------------------------------|------------|-------------|
| <b>1</b> | <b>XP_539304.3</b> | <b>Ameloblastin</b>                             | <b>26</b>                   | <b>8</b>                      | <b>795</b> | <b>1.18</b> |
| 2        | NP_001240670.1     | Keratin 14                                      | 16                          | 9                             | 408        | 0.84        |
| 3        | NP_001332964.1     | Keratin, type II cytoskeletal 5                 | 17                          | 10                            | 386        | 0.66        |
| 4        | NP_001003026.1     | Serum albumin precursor                         | 15                          | 8                             | 256        | 0.52        |
| 5        | NP_001003349.2     | Actin, cytoplasmic 2                            | 17                          | 8                             | 189        | 0.98        |
| 6        | XP_005618896.1     | Actin, alpha skeletal muscle                    | 9                           | 5                             | 111        | 0.46        |
| 7        | XP_544346.1        | Beta-actin-like protein 2                       | 3                           | 2                             | 47         | 0.16        |
| 8        | XP_532744.1        | Cationic trypsin-like                           | 8                           | 2                             | 124        | 0.27        |
| 9        | XP_005636600.1     | immunoglobulin lambda-1 light chain isoform X34 | 2                           | 1                             | 78         | 0.13        |
| 10       | XP_013966037.1     | uncharacterized protein LOC100856160            | 3                           | 2                             | 78         | 0.31        |
| 11       | XP_540286.2        | Histone H2A type 2-A                            | 2                           | 1                             | 67         | 0.24        |
| 12       | XP_013968873.1     | Apolipoprotein A-I                              | 3                           | 2                             | 57         | 0.23        |
| 13       | NP_001003090.1     | Collagen alpha-1(I) chain precursor             | 1                           | 1                             | 44         | 0.02        |
| 14       | NP_001184045.1     | Elongation factor 1-alpha 1                     | 1                           | 1                             | 42         | 0.07        |
| 15       | NP_001003187.1     | Collagen alpha-2(I) chain precursor             | 2                           | 2                             | 38         | 0.05        |

|    |                |                                                                             |   |   |    |      |
|----|----------------|-----------------------------------------------------------------------------|---|---|----|------|
| 16 | XP_013962533.1 | Transcription factor COE4                                                   | 1 | 1 | 33 | 0.05 |
| 17 | NP_001159360.1 | Serpin H1 precursor                                                         | 1 | 1 | 33 | 0.07 |
| 18 | XP_022272121.1 | LOW QUALITY PROTEIN: tRNA<br>(uracil(54)-C(5))-methyltransferase<br>homolog | 1 | 1 | 27 | 0.05 |
| 19 | XP_534537.3    | Serine/threonine-protein kinase LATS2                                       | 1 | 1 | 23 | 0.03 |

Ameloblastin is shown in bold. \*emPAI, exponentially modified protein abundance index.

**Table S3. Summary of proteins detected by LC/MS/MS of a cystic mass in right mandible amyloid Deposits in dog in number three**

| Rank | Accession          | Description                                                              | Num. of<br>significant<br>matches | Num. of<br>significant<br>sequences | Score      | emPAI*      |
|------|--------------------|--------------------------------------------------------------------------|-----------------------------------|-------------------------------------|------------|-------------|
| 1    | NP_001240670.1     | Keratin 14                                                               | 43                                | 19                                  | 1333       | 2.59        |
| 2    | NP_001257812.1     | Hemoglobin subunit beta-like                                             | 36                                | 10                                  | 1221       | 13.36       |
| 3    | NP_001332964.1     | Keratin, type II cytoskeletal 5                                          | 39                                | 17                                  | 822        | 1.62        |
| 4    | XP_003433560.1     | Keratin, type II cytoskeletal 6A                                         | 16                                | 7                                   | 241        | 0.52        |
| 5    | NP_001257815.1     | Hemoglobin subunit alpha-like                                            | 29                                | 5                                   | 758        | 5.02        |
| 6    | <b>XP_539304.3</b> | <b>Ameloblastin</b>                                                      | <b>18</b>                         | <b>3</b>                            | <b>735</b> | <b>0.42</b> |
| 7    | XP_543796.1        | Histone H2A.J                                                            | 10                                | 3                                   | 411        | 1.38        |
| 8    | XP_003639664.1     | Histone H2A type 2-C                                                     | 8                                 | 3                                   | 205        | 1.38        |
| 9    | XP_003639985.1     | Gamma-enolase                                                            | 9                                 | 2                                   | 232        | 0.22        |
| 10   | XP_854040.1        | Vitronectin                                                              | 6                                 | 3                                   | 197        | 0.19        |
| 11   | NP_001003026.1     | Serum albumin precursor                                                  | 6                                 | 4                                   | 185        | 0.2         |
| 12   | NP_001003370.1     | Clusterin precursor                                                      | 2                                 | 1                                   | 124        | 0.06        |
| 13   | NP_001003349.2     | Actin, cytoplasmic 2                                                     | 6                                 | 4                                   | 111        | 0.35        |
| 14   | NP_001003090.1     | collagen alpha-1(I) chain Precursor                                      | 5                                 | 3                                   | 83         | 0.07        |
| 15   | XP_005636600.1     | immunoglobulin lambda-1 Light chain<br>isoform X34                       | 1                                 | 1                                   | 78         | 0.13        |
| 16   | XP_022262838.1     | Complement C3                                                            | 2                                 | 1                                   | 74         | 0.04        |
| 17   | XP_536733.1        | Protein DJ-1 isoform X2                                                  | 2                                 | 1                                   | 71         | 0.17        |
| 18   | XP_532744.1        | Cationic trypsin-like                                                    | 2                                 | 1                                   | 63         | 0.13        |
| 19   | XP_531639.2        | ATP synthase subunit beta, mitochondrial                                 | 1                                 | 1                                   | 57         | 0.06        |
| 20   | NP_001003187.1     | collagen alpha-2(I) chain precursor                                      | 2                                 | 2                                   | 51         | 0.05        |
| 21   | XP_546510.3        | apolipoprotein A-IV                                                      | 1                                 | 1                                   | 51         | 0.07        |
| 22   | XP_013966037.1     | uncharacterized protein LOC100856160                                     | 1                                 | 1                                   | 35         | 0.15        |
| 23   | NP_001003142.2     | glyceraldehyde-3-phosphate Dehydrogenase                                 | 1                                 | 1                                   | 33         | 0.09        |
| 24   | XP_022260119.1     | Collectin-11 isoform X2                                                  | 1                                 | 1                                   | 31         | 0.11        |
| 25   | XP_013975554.1     | prolow-density lipoprotein receptor-related<br>protein 1-like isoform X1 | 1                                 | 1                                   | 29         | 0.01        |
| 26   | XP_005639594.1     | probable G-protein coupled Receptor 156<br>isoform X1                    | 1                                 | 1                                   | 19         | 0.04        |

Ameloblastin is shown in bold. \*emPAI, exponentially modified protein abundance index.

**Table S4. Summary of proteins detected by LC/MS/MS of right maxillary gingiva amyloid Deposits in cat number one**

| Rank | Accession      | Description                        | Num. of<br>significant<br>matches | Num. of<br>significant<br>sequences | Score | emPAI |
|------|----------------|------------------------------------|-----------------------------------|-------------------------------------|-------|-------|
| 1    | NP_001257812.1 | hemoglobin subunit beta-<br>like   | 12                                | 4                                   | 290   | 1.14  |
| 2    | NP_001003392.1 | keratin, type II cytoskeletal<br>1 | 7                                 | 4                                   | 190   | 0.22  |
| 3    | XP_532744.1    | cationic trypsin-like              | 7                                 | 2                                   | 136   | 0.27  |
| 4    | XP_539304.3    | ameloblastin                       | 3                                 | 2                                   | 105   | 0.15  |

|    |                |                                               |   |   |    |      |
|----|----------------|-----------------------------------------------|---|---|----|------|
| 5  | XP_854040.1    | vitronectin                                   | 2 | 1 | 95 | 0.06 |
| 6  | XP_013972063.1 | keratin, type I cytoskeletal<br>10 isoform X1 | 5 | 4 | 91 | 0.23 |
| 7  | XP_542374.3    | hemoglobin subunit epsilon                    | 2 | 1 | 80 | 0.21 |
| 8  | XP_013966596.1 | shugoshin 2<br>carnitine O-                   | 1 | 1 | 42 | 0.02 |
| 9  | NP_001273789.1 | palmitoyltransferase 1, liver<br>isoform      | 1 | 1 | 35 | 0.04 |
| 10 | XP_022263087.1 | mucin-16                                      | 1 | 1 | 25 | 0.01 |

Ameloblastin is shown in bold. \*emPAI, exponentially modified protein abundance index.

**Table S5. Summary of proteins detected by LC/MS/MS of left maxillary mass amyloid Deposits in cat number two**

| Rank | Accession      | Description                                         | Num. of significant matches | Num. of significant sequences | Score | emPAI |
|------|----------------|-----------------------------------------------------|-----------------------------|-------------------------------|-------|-------|
| 1    | NP_001240670.1 | keratin 14                                          | 26                          | 15                            | 578   | 1.65  |
| 2    | XP_548099.3    | keratin, type I cytoskeletal 42                     | 17                          | 8                             | 337   | 0.6   |
| 3    | XP_548107.2    | keratin, type I cuticular Ha6                       | 4                           | 3                             | 58    | 0.2   |
| 4    | XP_003433560.1 | keratin, type II cytoskeletal 6A                    | 25                          | 14                            | 553   | 1.09  |
| 5    | NP_001332964.1 | keratin, type II cytoskeletal 5                     | 23                          | 13                            | 399   | 0.93  |
| 6    | NP_001003392.1 | keratin, type II cytoskeletal 1                     | 7                           | 5                             | 85    | 0.28  |
| 7    | NP_001182774.2 | actin, cytoplasmic 1                                | 11                          | 6                             | 181   | 0.7   |
| 8    | XP_532744.1    | cationic trypsin-like                               | 9                           | 3                             | 150   | 0.43  |
| 9    | XP_539304.3    | ameloblastin                                        | 3                           | 2                             | 112   | 0.15  |
| 10   | NP_001003026.1 | serum albumin precursor                             | 2                           | 1                             | 96    | 0.05  |
| 11   | XP_013966037.1 | uncharacterized protein<br>LOC100856160             | 2                           | 1                             | 79    | 0.15  |
| 12   | XP_540286.2    | histone H2A type 2-A                                | 2                           | 1                             | 76    | 0.24  |
| 13   | XP_548841.3    | matrix-remodeling-associated<br>protein 5           | 1                           | 1                             | 34    | 0.01  |
| 14   | XP_003432104.1 | anionic trypsin                                     | 1                           | 1                             | 33    | 0.13  |
| 15   | XP_013965707.1 | LOW QUALITY PROTEIN: golgin<br>subfamily B member 1 | 2                           | 1                             | 31    | 0.01  |
| 16   | XP_539321.2    | histone H2B type 3-B                                | 1                           | 1                             | 29    | 0.24  |
| 17   | XP_022271308.1 | amelogenin, X isoform                               | 1                           | 1                             | 28    | 0.14  |
| 18   | XP_854395.1    | endonuclease 8-like 1 isoform X1                    | 1                           | 1                             | 26    | 0.08  |
| 19   | XP_539158.2    | metastasis suppressor protein 1<br>isoform X7       | 1                           | 1                             | 24    | 0.04  |
| 20   | XP_013970744.1 | dynein heavy chain 14, axonemal<br>isoform X1       | 1                           | 1                             | 20    | 0.01  |

Ameloblastin is shown in bold. \*emPAI, exponentially modified protein abundance index.

**Supplementary Figure S1.** a Pairwise Sequence Alignment of ameloblastin in dog (NCBI accession: XP\_539304.3) and cat (NCBI accession: XP\_044912677) is shown. The predicted signal sequence of ameloblastin in dogs is underlined.

|               |     |                                                             |     |
|---------------|-----|-------------------------------------------------------------|-----|
| XP_044912677. | 1   | MVYDSESHRLYTVVSSGTEQKDNSATYPTHYSETLLRVRAGIKGHKAYPS          | 50  |
| XP_539304.3   | 1   | -----                                                       | 0   |
| XP_044912677. | 51  | KTVLVKWVYNGYHLAGNNPEEKQMNHHFHIQSKQVLLGKLPRTAVSVAHT          | 100 |
| XP_539304.3   | 1   | -----                                                       | 0   |
| XP_044912677. | 101 | SAINSLVCKGSMQIYRSVQSGAGRAGPSLPPGRSLRTTTPLLALALGA            | 150 |
| XP_539304.3   | 1   | -----                                                       | 0   |
| XP_044912677. | 151 | EGQRFLRTLQALLSPRKLTDREHWTTEKCLPEAGTTLNEQDECGALECV           | 200 |
| XP_539304.3   | 1   | -----                                                       | 0   |
| XP_044912677. | 201 | KAASELYSPPAGEVTEINEALEENPALVKNFCYQDVKIPLSKMKDLILIF          | 250 |
|               |     | ...:    .    : .                                            |     |
| XP_539304.3   | 1   | ----- <u>MSALKIPLFKMKDLVLIL</u>                             | 18  |
| XP_044912677. | 251 | CLLEMSSAVPMFPQQPGTPGMASLSLETMRQLGSLQGLNMLSQYSRFGFG          | 300 |
|               |     | :     :                                                     |     |
| XP_539304.3   | 19  | <u>CLLKMS</u> SAVPVFPPQQPGTPGMASLSLETMRQLGSLQGLNMLSQYSRFGFG | 68  |
| XP_044912677. | 301 | KSFNSLWMHGLLPPHSSFPWMPREHETQQYEYSLPVHPPPLPSQPSLQP           | 350 |
|               |     |                                                             |     |
| XP_539304.3   | 69  | KSFNSLWMHGLLPPHSSFPWMPREHETQQYEYSLPVHPPPLPSQPSLQP           | 118 |
| XP_044912677. | 351 | QQPGQKPFLQPTIVTAIQDAAQKGGPHPPVYQGQPPLQQAEGPMLEQQVA          | 400 |
|               |     | ...   .   .   .   .   .   .   .   .                         |     |
| XP_539304.3   | 119 | QQPGQKPFLQSAIVTDIQDTAQKRGTPPVYQGQPPLQQTEGPMLEQQVA           | 168 |
| XP_044912677. | 401 | PSDKPPKAELPGMDFADPQGSPVFQIARLISRGPMQNKPSPLYPGIFYM           | 450 |
|               |     | :                                                           |     |
| XP_539304.3   | 169 | PSDKPPKAELPGMDFAEPPQGSPVFQIARLISRGPMQNKPSPLYPGIFYM          | 218 |

|               |     |                                                    |     |
|---------------|-----|----------------------------------------------------|-----|
| XP_044912677. | 451 | SYGANQLNAPARLGIMSSEEMAGGRGPMAYGAMFPGFGGMRPNLGGIPH  | 500 |
|               |     | .       .       :                                  |     |
| XP_539304.3   | 219 | SYGANQLNAPGRLGIMSSEEMAGGRGSPMAYGAMFPGFGGMRPNLGGMPH | 268 |
| XP_044912677. | 501 | NPAMGGDFTLEFDTPVAGTKGPEKGEGGAQGSPRPDVNPADPENPALLPE | 550 |
|               |     | .       :       .     :     .                      |     |
| XP_539304.3   | 269 | NPGMGGDFTLEFDSPVAGTKGPEKGEGGAQGSMPDVNPANPENPALLTE  | 318 |
| XP_044912677. | 551 | VAPGALGGLLAHPKGNDPSLARGPAGQSGGPPRVTPAEADPLMTPGLADI | 600 |
|               |     | :       .       :     .                            |     |
| XP_539304.3   | 319 | LAPGALGGLLAHPKDNDPSLARGPAGQSGGPPRVTPADADPLMTPELADI | 368 |
| XP_044912677. | 601 | YETYGADVTTPLEETPTDTTAIPDTQQTSMPENKAQQPQIMHDVWHFQEP | 650 |
|               |     | .     .       .                                    |     |
| XP_539304.3   | 369 | YETYGADVTTPLEETPTDTTVIPDTQQTLMPENKAQQPQIMHDGWHFQEP | 418 |
